# Supplementary material for: Shaoyang Xibi Decoction improves cholesterol accumulation to delay the progression of knee osteoarthritis by regulating the LXRα-ABCA1/ABCG1 signaling pathway
Source: Research Square preprint supplement (doi:10.21203/rs.3.rs-7556233/v1), 2025-10-20
Supplement: Supplementary file 1 [file 0ebbb0d785854a14cba724b8.docx]

Primer sequences

| Primer name |  | （5’ to 3’） |
| --- | --- | --- |
| COL2 | Forward | TCCTTCGGTCGGTGTCTGTCTG |
| Reverse | CCACGGCATCCCAAACCATCTC |
| COL10 | Forward | ATGGTGAGGCAGGTCCAAGAGG |
| Reverse | GGTTAGCACTGACAAGAGGCATCC |
| ACAN | Forward | TTAGACTCAGGGTGGGTGGACTTG |
| Reverse | AGAGCACGGATGAATGAACGGATG |
| SOX9 | Forward | GCGGAGGAAGTCGGTGAAGAATG |
| Reverse | CTTAGAAGTCTGAGTTGGCGGTGTG |
| LXRα | Forward | CTTCCAGCCAGCGTTAGCAGAC |
| Reverse | CACACCAGAAGAGGGCATCAATCC |
| ABCA1 | Forward | TCGCTTAGAGGTGAGGCTGATGG |
| Reverse | GTGTGGATGCTGGGAACTGAACTC |
| ABCG1 | Forward | ACCTTGGAGTGGAAGCAGCATTAAG |
| Reverse | GGACAACGATGATGACACAGGAGAG |
| GAPDH | Forward | GTCCATGCCATCACTGCCACTC |
| Reverse | CGCCTGCTTCACCACCTTCTTG |
